# Supplementary material for: The Persistence of HIV Diversity, Transcription, and Nef Protein in Kaposi’s Sarcoma Tumors during Antiretroviral Therapy
Source: MDPI journal article supplement (doi:10.3390/v14122774), 2022-12-13
Supplement: s1 [file s1]

**Table S1.** Availability of baseline and post-treatment specimens for 4 subjects with the interval days between samples.

| Subject ID | Specimen Type       | Baseline | Post-ART treatment | Interval Days* |
|------------|---------------------|----------|--------------------|----------------|
| K09        | Biopsy in RNA Later | Yes      | Yes                | 294            |
|            | PBMC                | Yes      | Yes                | 292            |
|            | Plasma              | Yes      | Yes                | 292            |
|            | Biopsy FFPE block   | N/A      | Yes                | 39             |
| K10        | Biopsy in RNA Later | Yes      | Yes                | 177            |
|            | PBMC                | Yes      | Yes                | 174            |
|            | Plasma              | Yes      | Yes                | 174            |
|            | Biopsy FFPE block   | Yes      | Yes                | 176            |
| K11        | Biopsy in RNA Later | Yes      | Yes                | 179            |
|            | PBMC                | Yes      | Yes                | 180            |
|            | Plasma              | Yes      | Yes                | 180            |
|            | Biopsy FFPE block   | N/A      | Yes                | 192            |
| K12        | Biopsy in RNA Later | Yes      | Yes                | 184            |
|            | PBMC                | Yes      | Yes                | 182            |
|            | Plasma              | Yes      | Yes                | 182            |
|            | Biopsy FFPE block   | Yes      | Yes                | 184            |

\* The days of specimen collection between baseline and post-ART treatment or between HIV virus assay date and post-ART treatment if baseline specimen unavailable.

**Table S2.** Primers used for SGS PCR and sequencing.

| Purpose            | Primer  | 5' to 3' Sequence             | HXB2 Position* | Reference  |
|--------------------|---------|-------------------------------|----------------|------------|
| SGS                | VIF_F2  | TGGAAAGGTGAAGGGGCAGTA         | 4956–4976      | [89]       |
| First Round        | 3UTR_R1 | TATTGAGGCTTAAGCAGTGGGTTC      | 9615–9592      | [89]       |
| SGS                | ENV_F1  | GGCTTAGGCATCTCCTATGGCAGGAAGAA | 5954–5982      | [89]       |
| Second Round       | 3UTR_R6 | GCTTATATGCAGCATCTGAGGG        | 9497–9518      | [89]       |
|                    | ENV_F2  | CATGCCTGTGTACCCACAGAC         | 6438–6458      | this study |
|                    | ENV_F3  | CCAATTCCYATACATTATTGTGC       | 6858–6880      | this study |
| Sequencing Primers | 120_F2  | AGACCTGGAGGAGGARATATGA        | 7629–7650      | this study |
|                    | 120_R3  | CGCCCATMGTGCTTCCTGCTG         | 7818–7838      | this study |
|                    | NEF_F1  | CAGCAGGAAGCACTATGGGCG         | 7798–7818      | [89]       |
|                    | NEF_F4  | ATGATAGTAGGAGGCTTMATAGG       | 8283–8305      | this study |
|                    | NEF_R6  | GGTAGCTGAAGAGGCACAG           | 8529–8511      | this study |

\*base pair positions relative to the HIV-1 HXB2 reference

**Table S3.** p-values for the structured Slatkin–Maddison test for compartmentalization.

| Patient | Gene       | TM base vs TM post | TM post vs PBMC post | TM base vs PL base vs PBMC base |
|---------|------------|--------------------|----------------------|---------------------------------|
| K09     | <i>env</i> | 0.078              | 0.549                | 0.738                           |
| K09     | <i>nef</i> | 0.204              | 0.935                | 0.607                           |
| K10     | <i>env</i> | 1                  | 0.774                | 0.011*                          |
| K10     | <i>nef</i> | 1                  | 0.538                | 0.022                           |
| K11     | <i>env</i> | 0.636              | 0.045                | 0.289                           |

|     |            |   |       |       |
|-----|------------|---|-------|-------|
| K11 | <i>nef</i> | 1 | 0.590 | 0.547 |
| K12 | <i>env</i> | 1 | 0.989 | 0.996 |
| K12 | <i>nef</i> | 1 | 0.896 | 0.973 |

Baseline=base, post-treatment=post, TM=tumor, PL=plasma, PBMC=peripheral mononuclear cells.

\* Indicates p-value was significantly lower than the alpha level of p=0.002, which accounts for multiple tests.

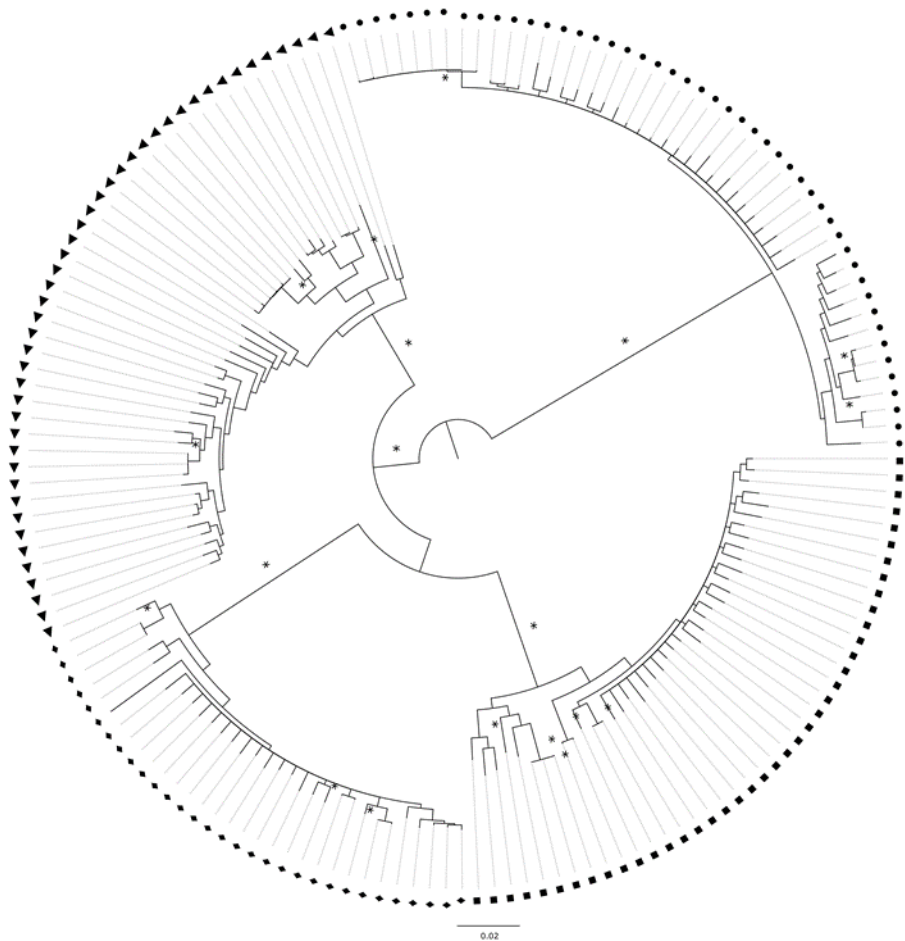

**Figure S1** Maximum-Likelihood phylogeny of all *env* sequences for 4 subjects, variable regions removed. Sequences for each subject are exclusive to a single main branch on the phylogeny, indicating no cross-contamination between subjects. Statistical support of branches was assessed with 1000 bootstrap replicates and branches with 100% support are denoted with an asterisk. Legend: K09=square, K10=triangle, K11=circle, K12=diamond.

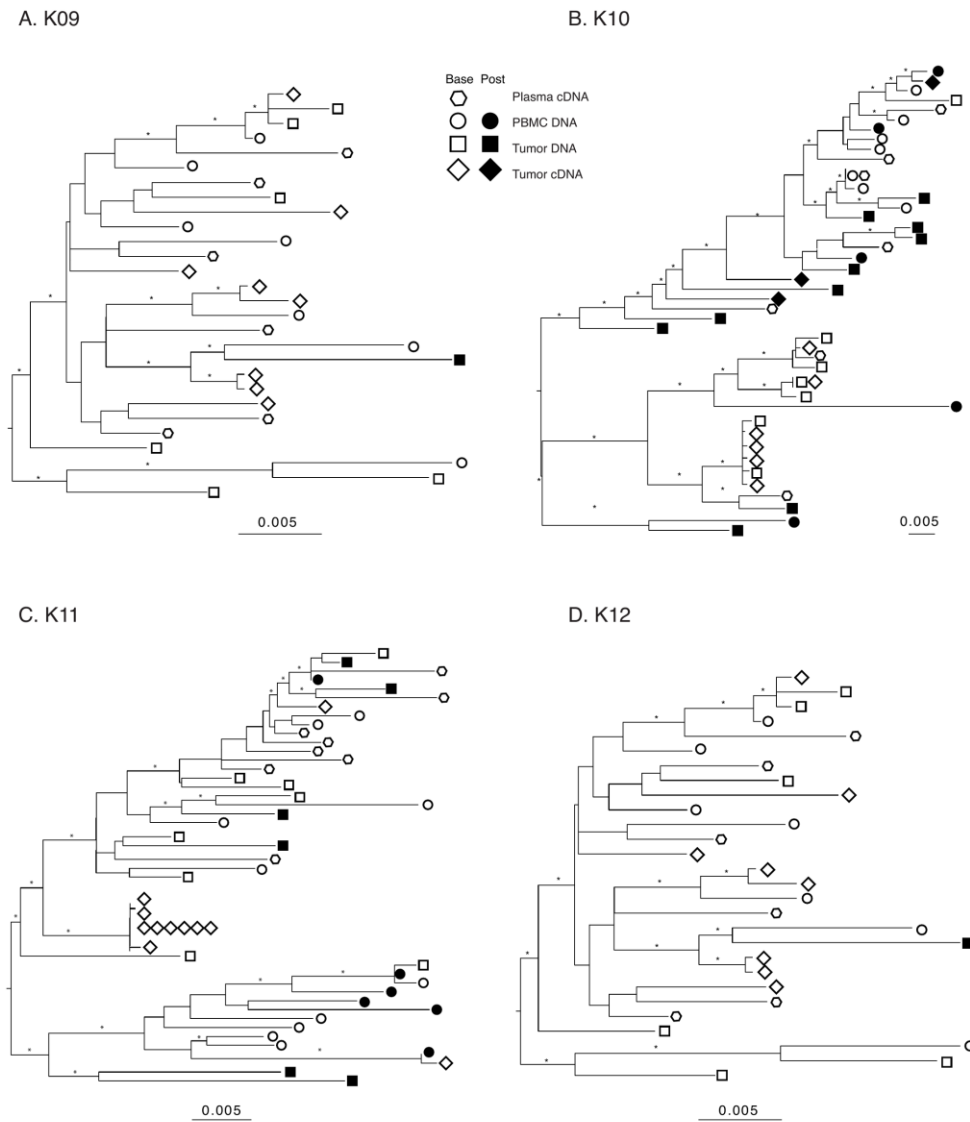

**Figure S2.** Maximum-likelihood (ML) phylogenies of *env* sequences. Phylogenies for each patient were estimated using IQ-TREE2 [94] under a general-time-reversible (GTR) nucleotide substitution model and gamma-distributed rate variation among sites. Statistical support of branches was assessed with 1000 bootstrap replicates and branches with 75% or more support are denoted with an asterisk. Phylogenies were visualized and midpoint rooted using FigTree.

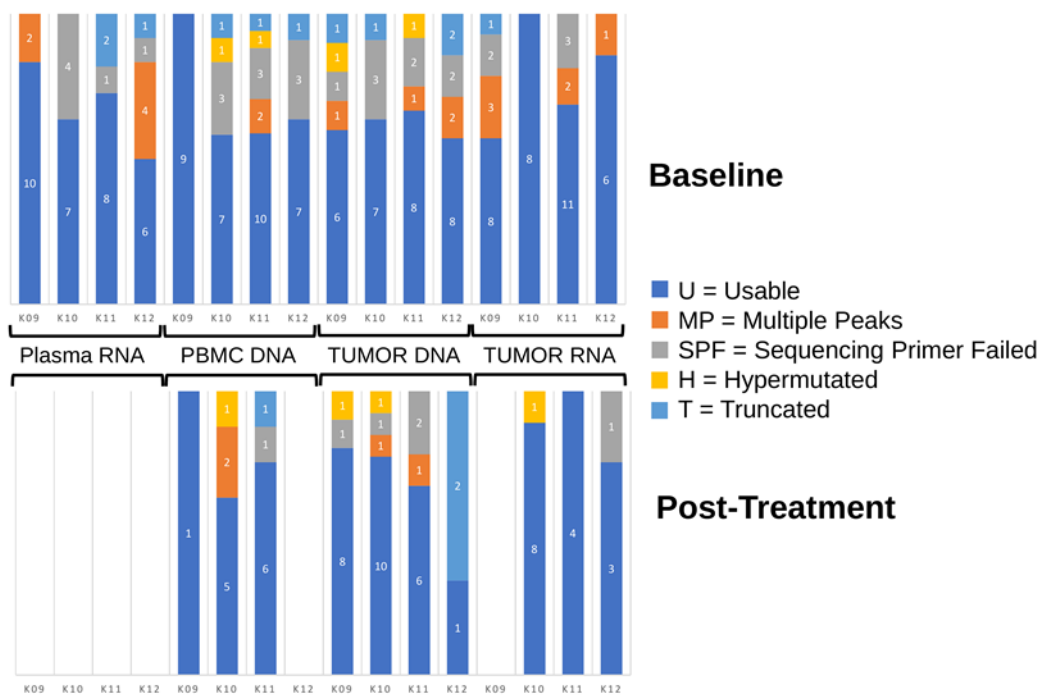

**Figure S3.** Number of usable and unusable sequences at baseline and post-treatment timepoints. U—Usable sequences were complete *env-nef* HIV genome sections or correctly spliced RNA transcripts. MP—Manual examination of the chromatograms was used to determine if multiple peaks existed at each nucleotide. SPF—Sequencing primers failed to work for some products. H—Hypermutated sequences were determined by the Los Alamos HYPERMUTE tool. T—Truncated sequences.
